# Supplementary material for: Effects of nitrogen availability on polymalic acid biosynthesis in the yeast-like fungus Aureobasidium pullulans
Source: PubMed Central journal article supplement (PMC4994417; doi:10.1186/s12934-016-0547-y), 2016-08-22
Supplement: 12934_2016_547_MOESM1_ESM.pdf [file 12934_2016_547_MOESM1_ESM.pdf]

**Table S1** Primers for the gene transcription level analysis

| Genes | Primer name | Primer sequence       | Product size<br>(bp) |
|-------|-------------|-----------------------|----------------------|
| GS    | GS-F        | AACTTCGACGGTTCGTCAAC  | 183                  |
|       | GS-R        | CATAAGGAGAGCAGCGTCGT  |                      |
| TOR1  | TOR1-F      | TCATCGCATAACAAGCAAAGC | 129                  |
|       | TOR1-R      | AGGCACGTACCTTGAGCATT  |                      |
| Tap42 | Tap42-F     | CATCCCCGGCTGTGTCA     | 157                  |
|       | Tap42-R     | AAAGGACGTACAACGCCATGT |                      |
| Gat1  | Gat1-F      | TACTCCTACCACCCAGACCA  | 141                  |
|       | Gat1-R      | TGCTTCCGCTGACGCTTA    |                      |
| GLK   | GLK-F       | GACACTGTGCGGAACCCTCAT | 169                  |
|       | GLK-R       | TCTCACCAGTGGTCTTGTCG  |                      |
| FUM   | FUM-F       | TCTTTGACCATGCTCTGCTG  | 260                  |
|       | FUM-R       | TAGCCAATGACGGGGTTAAG  |                      |
| CS    | CS-F        | TCCCTGGCGAGATTGAGAAG  | 173                  |
|       | CS-R        | GATAGTCTTGCCACGGAAACG |                      |
| DAT   | DAT-F       | TCTGGACTGGCTTGACTGGAT | 155                  |
|       | DAT-R       | ACCAGCGACACCGGAACA    |                      |
| MCL   | Mcl-F       | TCTCCCCTCAGTGCATCGA   | 173                  |
|       | Mcl-R       | CTGTCTGAAGTCGGCGTTGTC |                      |
