# Supplementary material for: Effects of nitrogen availability on polymalic acid biosynthesis in the yeast-like fungus Aureobasidium pullulans
Source: PubMed Central journal article supplement (PMC4994417; doi:10.1186/s12934-016-0547-y), 2016-08-22

**Figure S1. Total numbers of differentially expressed genes (DEGs) under nitrogen-sufficient conditions.**

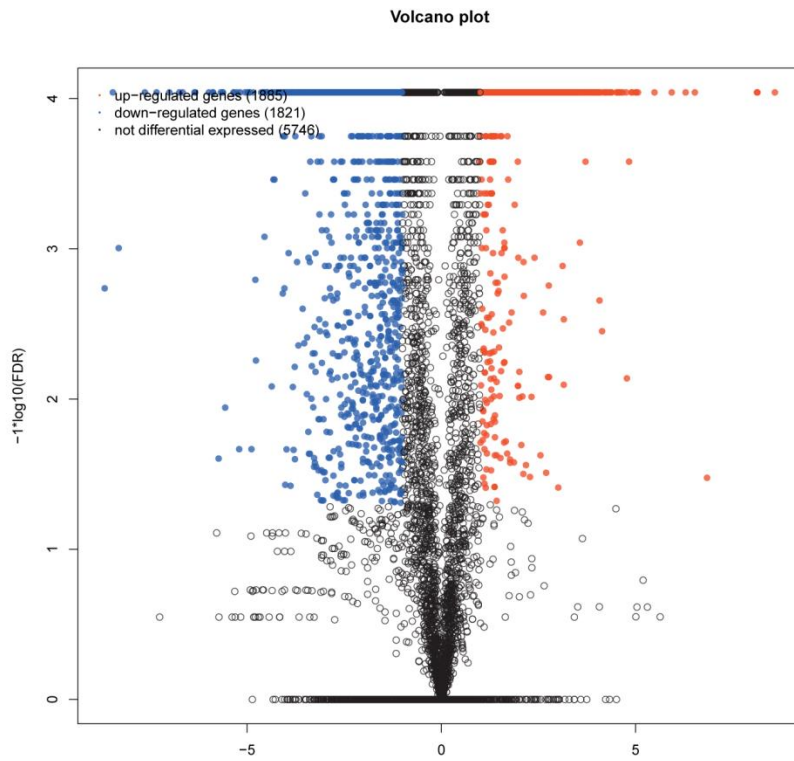

Supplement: 12934_2016_547_MOESM2_ESM.pdf [file 12934_2016_547_MOESM2_ESM.pdf]
